# Supplementary material for: Hospital burden of coronary artery disease: Trends of myocardial infarction and/or percutaneous coronary interventions in France 2009–2014
Source: PubMed Central journal article supplement (PMC6497251; doi:10.1371/journal.pone.0215649), 2019-05-02
Supplement: pone.0215649.s001.pdf [file pone.0215649.s001.pdf]

**International Classification Diseases 10<sup>th</sup> version Codes**

| <b>Code</b> | <b>Detail</b>                                                       |
|-------------|---------------------------------------------------------------------|
| I21         | Acute myocardial infarction                                         |
| I22         | Subsequent myocardial infarction                                    |
| I23         | Certain current complications following acute myocardial infarction |
| I24         | Other acute ischaemic heart diseases                                |

**Common Classification of Medical Procedures Codes**

| <b>Code</b> | <b>Detail</b>                                                                                                           |
|-------------|-------------------------------------------------------------------------------------------------------------------------|
| DDAF001     | Intraluminal dilatation of a coronary vessel without stenting, transcatheter arterial                                   |
| DDAF003     | Intraluminal dilatation of 3 or more coronary vessels with stenting, transcatheter arterial                             |
| DDAF004     | Intraluminal dilatation of 2 coronary vessels with stenting, transcatheter arterial                                     |
| DDAF006     | Intraluminal dilatation of a coronary vessel with stenting, transcatheter arterial                                      |
| DDAF007     | Intraluminal dilatation of 2 coronary vessels with coronary arteriography with stenting, transcatheter arterial         |
| DDAF008     | Intraluminal dilatation of a coronary vessel with coronary arteriography with stenting, transcatheter arterial          |
| DDAF009     | Intraluminal dilatation of 3 or more coronary vessels with coronary arteriography with stenting, transcatheter arterial |
| DDAF010     | Intraluminal dilatation of a coronary vessel with coronary arteriography without stenting, transcatheter arterial       |
| DDFF001     | Intraluminal coronary artery atherectomy by rotational method, transcatheter arterial                                   |
| DDFF002     | Intraluminal coronary artery atherectomy by directional method, transcatheter arterial                                  |
