# Supplementary material for: Hospital burden of coronary artery disease: Trends of myocardial infarction and/or percutaneous coronary interventions in France 2009–2014
Source: PubMed Central journal article supplement (PMC6497251; doi:10.1371/journal.pone.0215649), 2019-05-02
Supplement: pone.0215649.s002.pdf [file pone.0215649.s002.pdf]

S2 Table. Distribution of French Inhabitants by regions according to sex and average annual growth rate from 2009 to 2014.

| Region               | Sex | Population |            |            |            |            |            | Annual growth rate (%) |
|----------------------|-----|------------|------------|------------|------------|------------|------------|------------------------|
|                      |     | 2009       | 2010       | 2011       | 2012       | 2013       | 2014       |                        |
| Alsace               | M   | 669 965    | 672 813    | 675 957    | 679 163    | 681 876    | 686 458    | 0.49                   |
|                      | W   | 723 230    | 725 180    | 728 256    | 731 179    | 733 677    | 741 096    | 0.49                   |
| Aquitaine            | M   | 1 170 514  | 1 181 478  | 1 190 981  | 1 201 315  | 1 210 641  | 1 227 326  | 0.95                   |
|                      | W   | 1 311 282  | 1 321 978  | 1 331 132  | 1 341 830  | 1 350 766  | 1 367 094  | 0.84                   |
| Auvergne             | M   | 500 007    | 501 479    | 504 543    | 506 434    | 507 553    | 508 525    | 0.34                   |
|                      | W   | 549 879    | 550 211    | 551 430    | 552 680    | 553 310    | 555 976    | 0.22                   |
| Basse-Normandie      | M   | 528 858    | 531 810    | 533 289    | 535 375    | 536 826    | 536 895    | 0.3                    |
|                      | W   | 583 318    | 585 734    | 587 881    | 589 885    | 590 885    | 591 106    | 0.27                   |
| Burgundy             | M   | 601 664    | 603 454    | 604 544    | 605 427    | 605 872    | 605 261    | 0.12                   |
|                      | W   | 664 036    | 664 833    | 666 167    | 666 843    | 666 903    | 665 989    | 0.06                   |
| Brittany             | M   | 1 144 204  | 1 154 495  | 1 163 362  | 1 171 915  | 1 180 203  | 1 189 240  | 0.78                   |
|                      | W   | 1 257 208  | 1 266 929  | 1 273 997  | 1 282 533  | 1 290 436  | 1 298 329  | 0.65                   |
| Centre               | M   | 921 444    | 924 730    | 927 351    | 930 469    | 933 180    | 934 515    | 0.28                   |
|                      | W   | 1 007 264  | 1 010 076  | 1 014 855  | 1 019 112  | 1 022 087  | 1 024 547  | 0.34                   |
| Champagne-Ardenne    | M   | 481 914    | 482 878    | 483 902    | 484 339    | 484 263    | 486 540    | 0.19                   |
|                      | W   | 526 700    | 526 007    | 527 253    | 527 201    | 526 698    | 529 341    | 0.1                    |
| Corsica              | M   | 116 879    | 117 905    | 120 109    | 121 948    | 123 731    | 123 397    | 1.09                   |
|                      | W   | 126 043    | 126 918    | 128 978    | 130 402    | 131 959    | 133 923    | 1.22                   |
| Franche-Comté        | M   | 425 104    | 426 397    | 427 593    | 429 005    | 430 580    | 431 247    | 0.29                   |
|                      | W   | 453 626    | 454 655    | 455 847    | 457 311    | 458 461    | 459 538    | 0.26                   |
| Haute-Normandie      | M   | 643 469    | 646 288    | 648 614    | 651 055    | 653 239    | 655 311    | 0.37                   |
|                      | W   | 715 960    | 718 911    | 721 000    | 723 676    | 725 530    | 727 391    | 0.32                   |
| Ile-de-France        | M   | 4 114 166  | 4 135 376  | 4 161 770  | 4 186 094  | 4 208 579  | 4 221 669  | 0.52                   |
|                      | W   | 4 571 811  | 4 594 713  | 4 620 064  | 4 646 085  | 4 671 065  | 4 681 564  | 0.48                   |
| Languedoc-Roussillon | M   | 940 158    | 950 114    | 962 878    | 974 680    | 986 093    | 997 858    | 1.19                   |
|                      | W   | 1 059 907  | 1 071 814  | 1 084 188  | 1 096 197  | 1 107 559  | 1 125 115  | 1.2                    |
| Limousin             | M   | 280 041    | 279 712    | 278 865    | 278 713    | 278 342    | 275 891    | -0.29                  |
|                      | W   | 309 830    | 310 260    | 309 513    | 309 402    | 309 129    | 306 326    | -0.23                  |
| Lorraine             | M   | 858 196    | 860 220    | 861 709    | 863 625    | 865 010    | 862 945    | 0.11                   |
|                      | W   | 929 882    | 932 356    | 933 387    | 935 155    | 935 850    | 933 775    | 0.08                   |
| Midi-Pyrénées        | M   | 1 058 299  | 1 066 386  | 1 074 895  | 1 083 069  | 1 091 496  | 1 102 577  | 0.82                   |
|                      | W   | 1 150 847  | 1 159 415  | 1 167 396  | 1 175 445  | 1 182 704  | 1 197 360  | 0.79                   |
| Nord Pas de Calais   | M   | 1 386 140  | 1 389 885  | 1 394 057  | 1 398 289  | 1 401 560  | 1 409 621  | 0.34                   |
|                      | W   | 1 556 152  | 1 558 821  | 1 562 421  | 1 565 348  | 1 567 015  | 1 572 252  | 0.21                   |
| Pays de Loire        | M   | 1 262 526  | 1 274 082  | 1 284 579  | 1 295 710  | 1 305 727  | 1 317 498  | 0.86                   |
|                      | W   | 1 373 432  | 1 387 214  | 1 398 392  | 1 409 957  | 1 420 190  | 1 430 320  | 0.82                   |
| Picardy              | M   | 677 930    | 679 285    | 681 571    | 683 476    | 685 148    | 688 019    | 0.29                   |
|                      | W   | 731 988    | 734 223    | 737 078    | 739 096    | 740 397    | 743 494    | 0.31                   |
| Poitou-Charentes     | M   | 648 648    | 652 879    | 656 813    | 660 153    | 662 940    | 664 010    | 0.47                   |
|                      | W   | 715 661    | 719 619    | 722 768    | 726 387    | 728 969    | 731 224    | 0.43                   |
| PACA                 | M   | 1 751 141  | 1 759 245  | 1 769 471  | 1 777 398  | 1 784 466  | 1 796 756  | 0.52                   |
|                      | W   | 1 997 353  | 2 003 680  | 2 011 028  | 2 016 988  | 2 020 418  | 2 034 734  | 0.37                   |
| Rhône-Alpes          | M   | 2 202 069  | 2 224 430  | 2 245 109  | 2 266 394  | 2 286 893  | 2 309 097  | 0.95                   |
|                      | W   | 2 398 124  | 2 419 755  | 2 444 943  | 2 466 852  | 2 487 557  | 2 511 882  | 0.93                   |
| Metropolitan France  | M   | 22 383 336 | 22 515 341 | 22 651 962 | 22 784 046 | 22 904 218 | 23 030 656 | 0.57                   |
|                      | W   | 24 713 533 | 24 843 302 | 24 977 974 | 25 109 564 | 25 221 565 | 25 362 376 | 0.52                   |

Insee source.
